# Supplementary material for: Few Ant Species Play a Central Role Linking Different Plant Resources in a Network in Rupestrian Grasslands
Source: PLOS journal article supplement (doi:10.1371/journal.pone.0167161), 2016-12-02
Supplement: S6 (10.1371/journal.pone.0167161.s006) [file journal.pone.0167161.s006]

**S6 Table. Generalized linear model (GLM) analysis showing the relationship between centrality degree of ant species (n = 30) and their abundance and recruitment. Abundance data was recorded by pitfall traps installed in the studied sites (symbol “\*” represents significant differences, Df = degrees of freedom).**

| <b>Response variable</b> | <b>Explanatory variable</b> | <b>Df</b> | <b>Deviance</b> | <b>P-value</b> | <b>Error distribution</b> |
|--------------------------|-----------------------------|-----------|-----------------|----------------|---------------------------|
| Centrality degree        | Ant recruitment             | 28        | 55.358          | < 0,001*       | Negative binomial         |
| Centrality degree        | Ant abundance               | 28        | 0.10802         | 0.7424         | Poisson                   |
